# Supplementary material for: SnS/C nanocomposites for high-performance sodium ion battery anodes
Source: Royal Society of Chemistry journal article supplement (doi:10.1039/c8ra04421j), 2018-01-01
Supplement: c8ra04421j1.pdf [file c8ra04421j1.pdf]

## Supplementary Information

### SnS/C nanocomposites for high-performance sodium ion battery anodes

Seung-Ho Yu,<sup>‡ab</sup> Aihua Jin,<sup>‡cd</sup> Xin Huang,<sup>e</sup> Yao Yang,<sup>a</sup> Rong Huang,<sup>b</sup> Joel D. Brock,<sup>be</sup> Yung-Eun Sung,<sup>\*cd</sup> and Héctor D. Abruña<sup>\*a</sup>

<sup>a</sup> *Department of Chemistry and Chemical Biology, Cornell University, Ithaca, New York 14853, USA*

<sup>b</sup> *Cornell High Energy Synchrotron Source, Cornell University, Ithaca, NY 14853, USA*

<sup>c</sup> *Center for Nanoparticle Research, Institute for Basic Science (IBS), Seoul 151-742, Republic of Korea*

<sup>d</sup> *School of Chemical and Biological Engineering, Seoul National University, Seoul 151-742, Republic of Korea*

<sup>e</sup> *School of Applied and Engineering Physics, Cornell University, Ithaca, New York 14853, USA*

<sup>‡</sup> *These authors contributed equally to this work.*

\* Corresponding authors:

E-mail address: hda1@cornell.edu (Héctor D. Abruña), ysung@snu.ac.kr (Yung-Eun Sung)

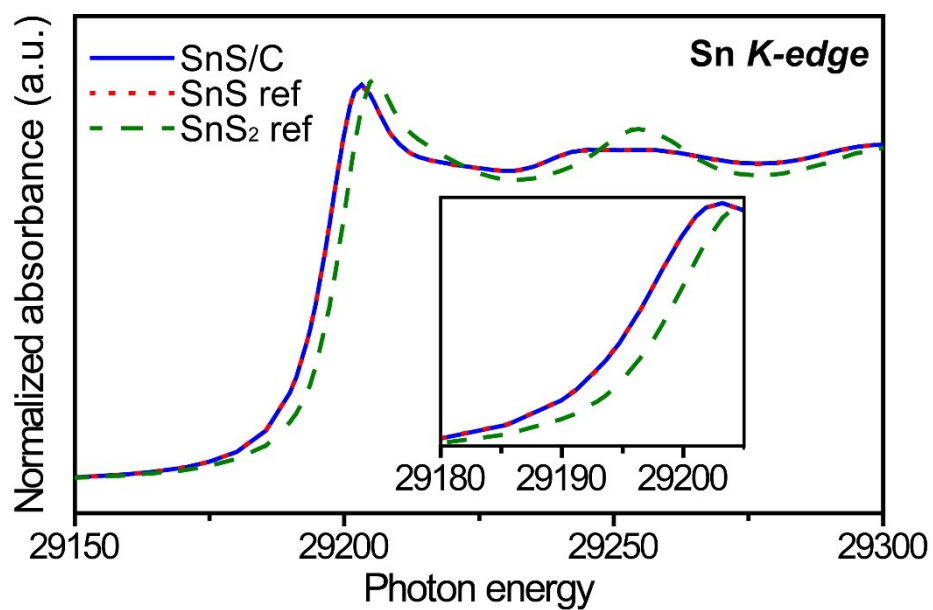

**Fig. S1.** XANES spectra of SnS/C nanocomposites (blue line), commercial SnS (red dots) and SnS<sub>2</sub> (green dash).

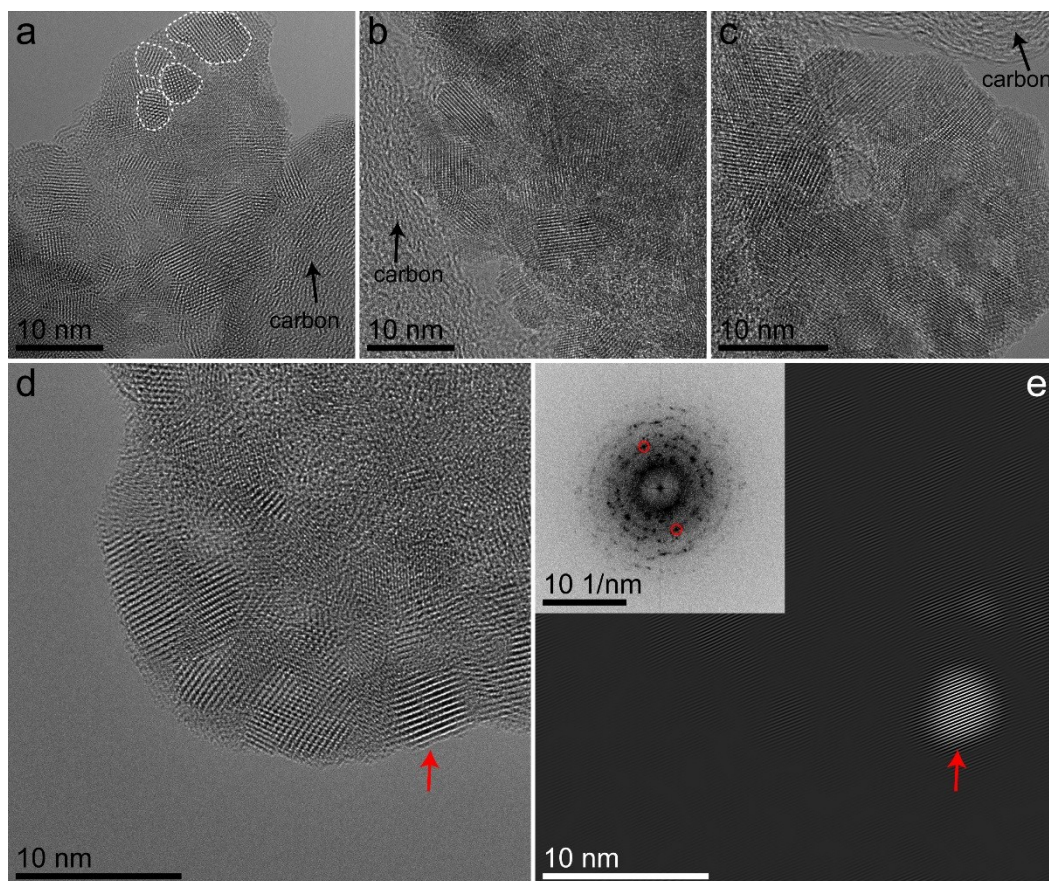

**Fig. S2.** (a)-(d) High-resolution TEM images of SnS/C nanocomposites, and (e) inverse fast Fourier transformed (FFT) image from the region circled by red in inset. Inset shows FFT image of (d).

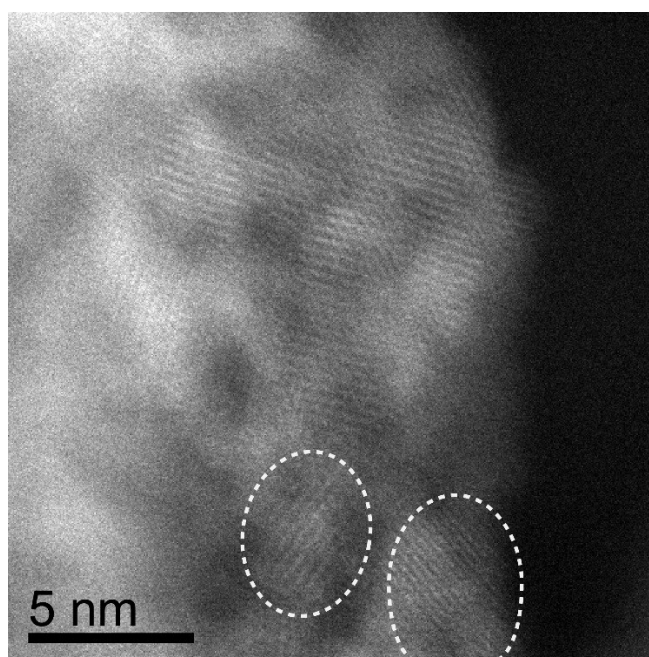

**Fig. S3.** STEM image of SnS/C nanocomposites.

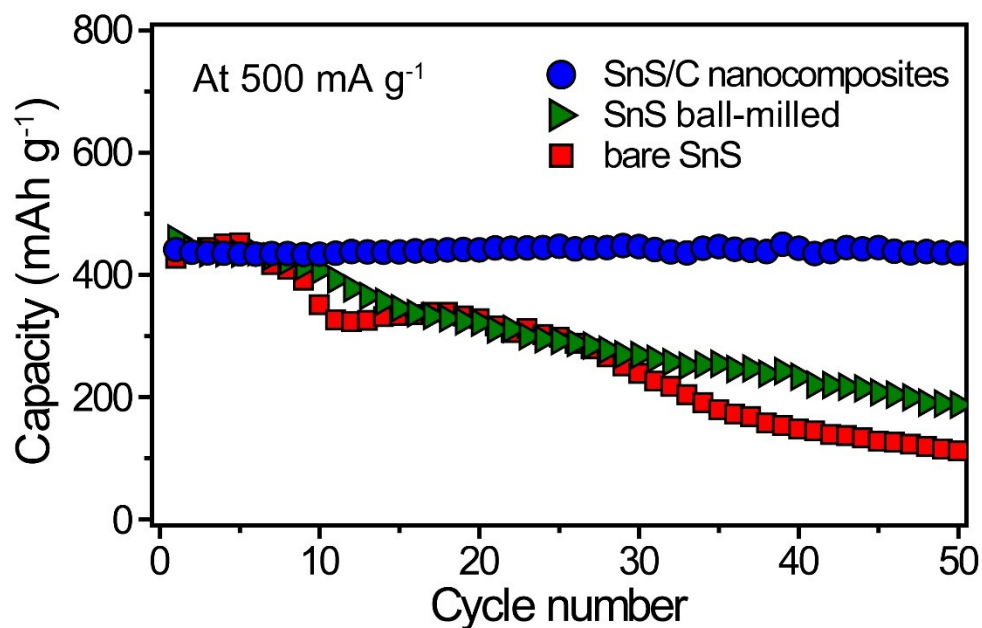

**Fig. S4** Cycle performance of SnS/C nanocomposites, ball-milled SnS without carbon, and bare SnS at a current density of 500 mA g<sup>-1</sup>.

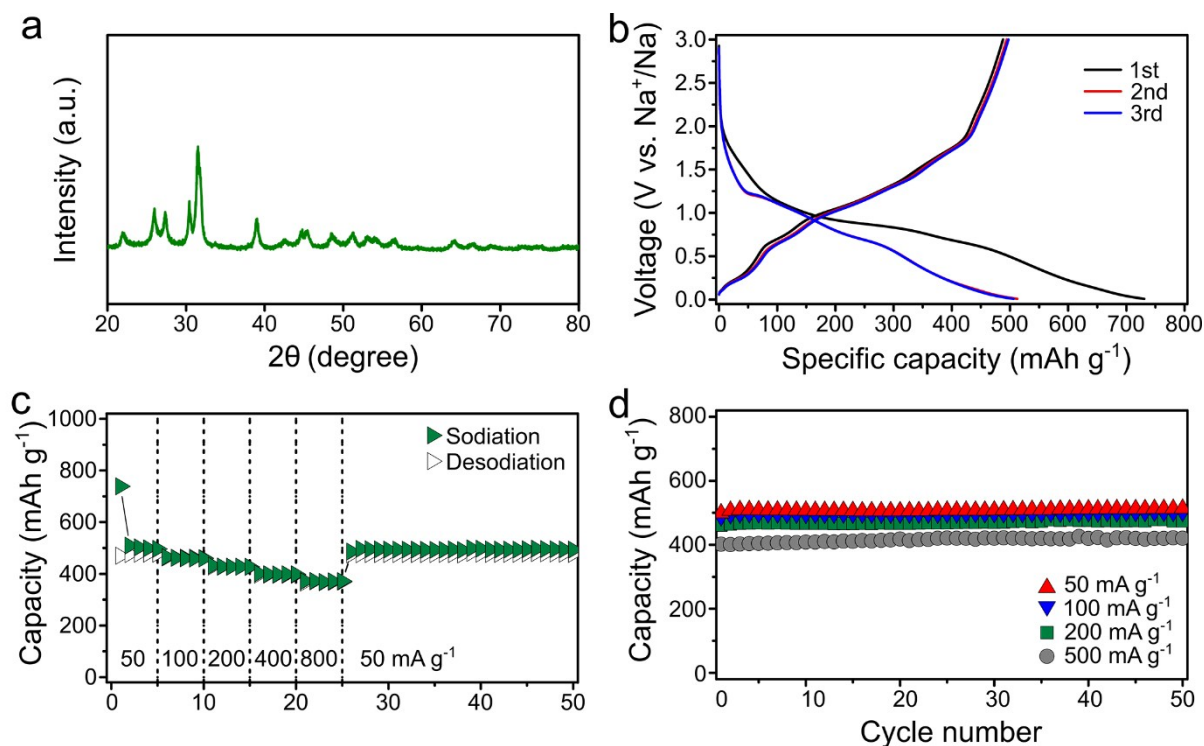

**Fig. S5.** (a) XRD patterns of SnS/mesoporous carbon (CMK) nanocomposites prepared by ball-milling method. (b) Voltage profiles of SnS/CMK nanocomposites at a current density of 100 mA g<sup>-1</sup>. (c) Rate performance of SnS/CMK nanocomposites. (d) Cycling performance of SnS/CMK nanocomposites at various current densities.

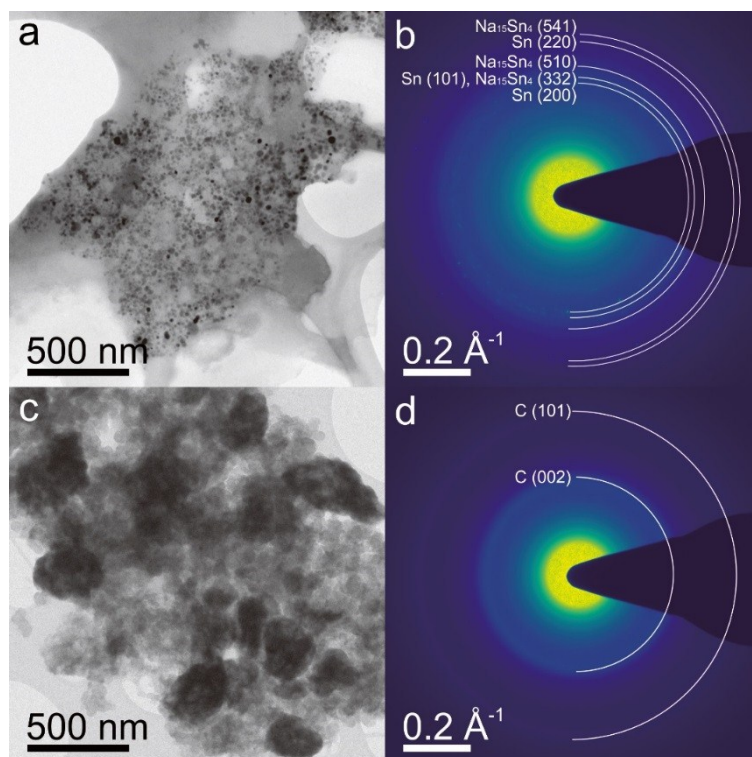

**Fig. S6.** (a) TEM image and (b) SAED pattern of SnS/C nanocomposites at fully sodiated state (0.01 V). (c) TEM image and (d) SAED pattern of SnS/C nanocomposites at fully desodiated state (3.0 V).
